# Supplementary material for: Binary polymer brush patterns from facile initiator stickiness for cell culturing
Source: Royal Society of Chemistry journal article supplement (doi:10.1039/c9fd00013e), 2019-01-01
Supplement: c9fd00013e1.pdf [file c9fd00013e1.pdf]

## Supporting Information

# Binary Polymer Brush Patterns from Facile Initiator Stickiness for Cell Culturing

Lina Chen<sup>a</sup>, Peng Li<sup>a</sup>, Xi Lu<sup>a</sup>, Shutao Wang<sup>b</sup> and Zijian Zheng<sup>\*a</sup>

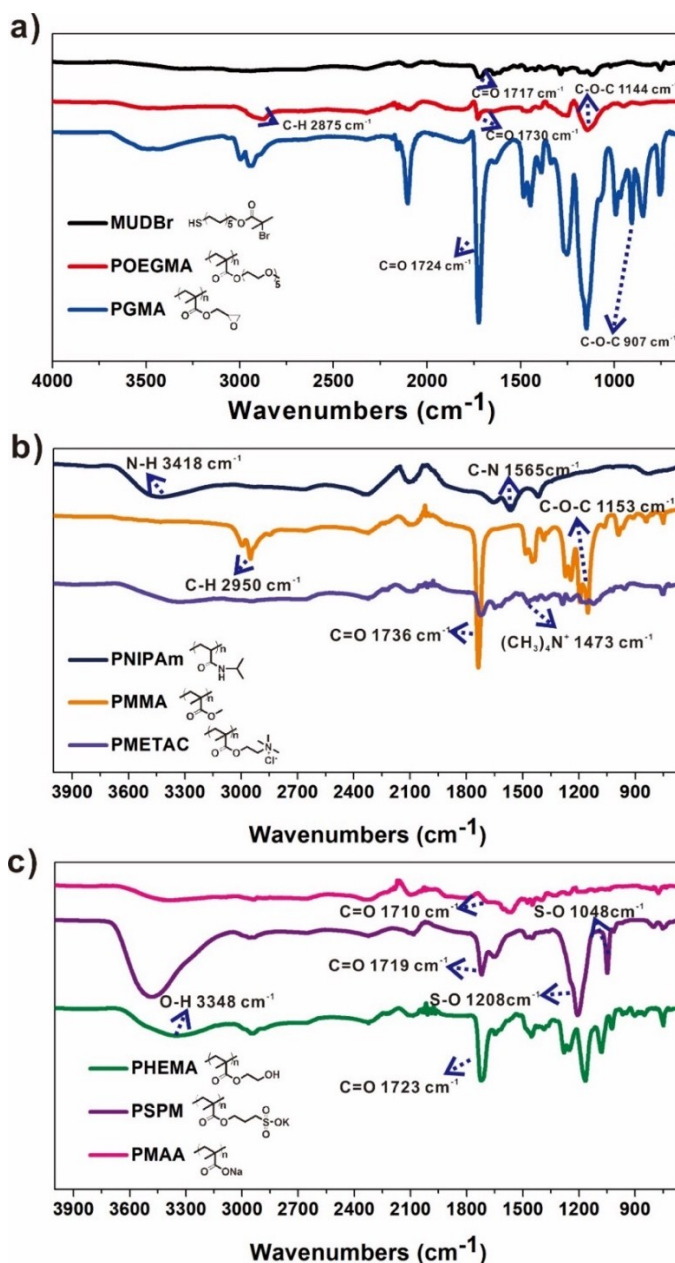

**Fig. S1.** (a-c) ATR-FTIR spectra of MUDBr SAM and various polymer brushes coated-Au substrates.
